# Supplementary material
Source: PubMed Central journal article supplement (PMC514942)
Supplement: 7600278s1.pdf [file 7600278s1.pdf]

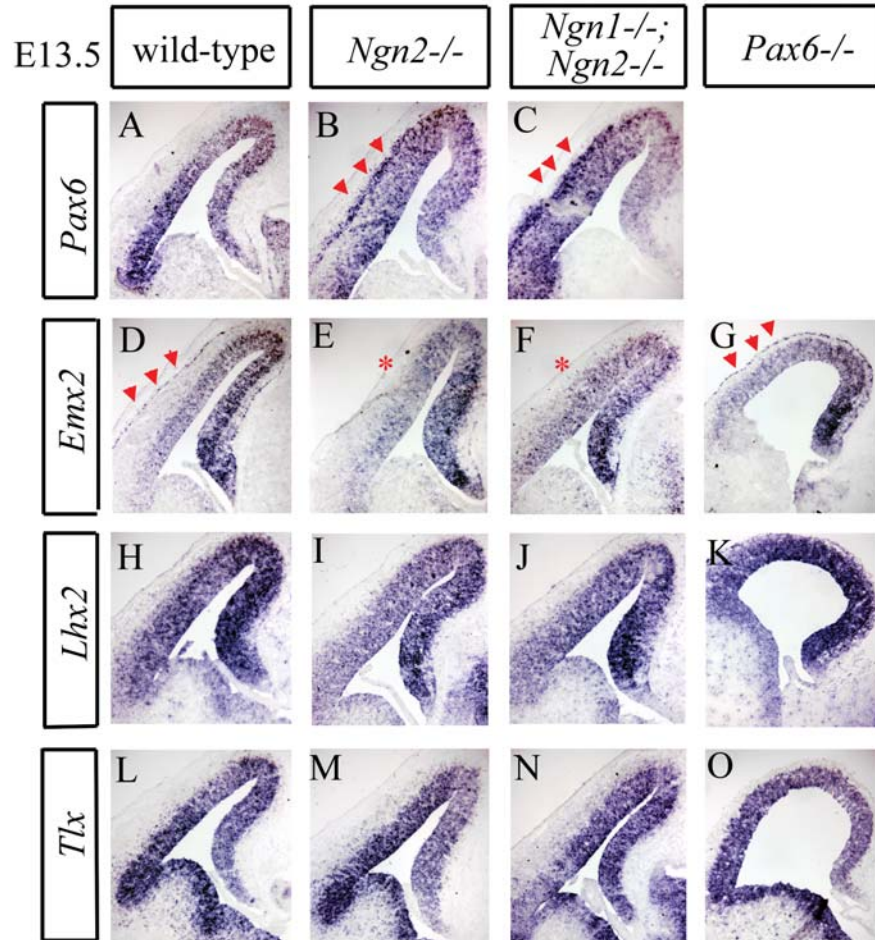

Schuurmans\_Suppl. Fig. 1

**Supplementary Figure 1. Expression of cortical progenitor cell markers in *Ngn* and *Pax6* mutants at E13.5** (A-C) *Pax6* is normally expressed in the VZ and is ectopic in the PP (arrowheads, B, C) in the absence of *Ngn1/2* function. (D-G) *Emx2* is expressed in the VZ and PP (arrowheads) of wild-type (D) and *Pax6* mutants (G), and in the VZ but not PP (asterisk) of *Ngn2* (E) and *Ngn1;Ngn2* (F) mutants. (H-K) *Lhx2* is expressed in VZ progenitors in all genotypes. (L-O) *Tlx* is normally expressed in VZ progenitors in all genotypes.
