# Supplementary material
Source: PubMed Central journal article supplement (PMC514942)
Supplement: 7600278s2.pdf [file 7600278s2.pdf]

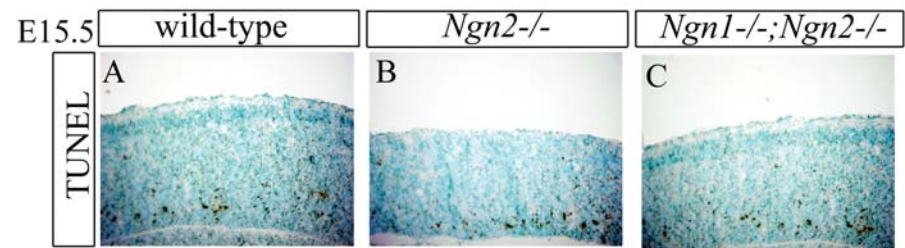

Schuurmans\_Suppl Fig. 2

**Supplementary Figure 2. Apoptosis does not increase in E15.5 *Ngn* mutants.** (A-C) TUNEL staining labeled scattered GZ progenitors in the cortical GZ in wild-type, *Ngn2* and *Ngn1;Ngn2* mutants, with no obvious increase in apoptotic cells in the mutant backgrounds.
