# Supplementary material
Source: PubMed Central journal article supplement (PMC514942)
Supplement: 7600278s3.pdf [file 7600278s3.pdf]

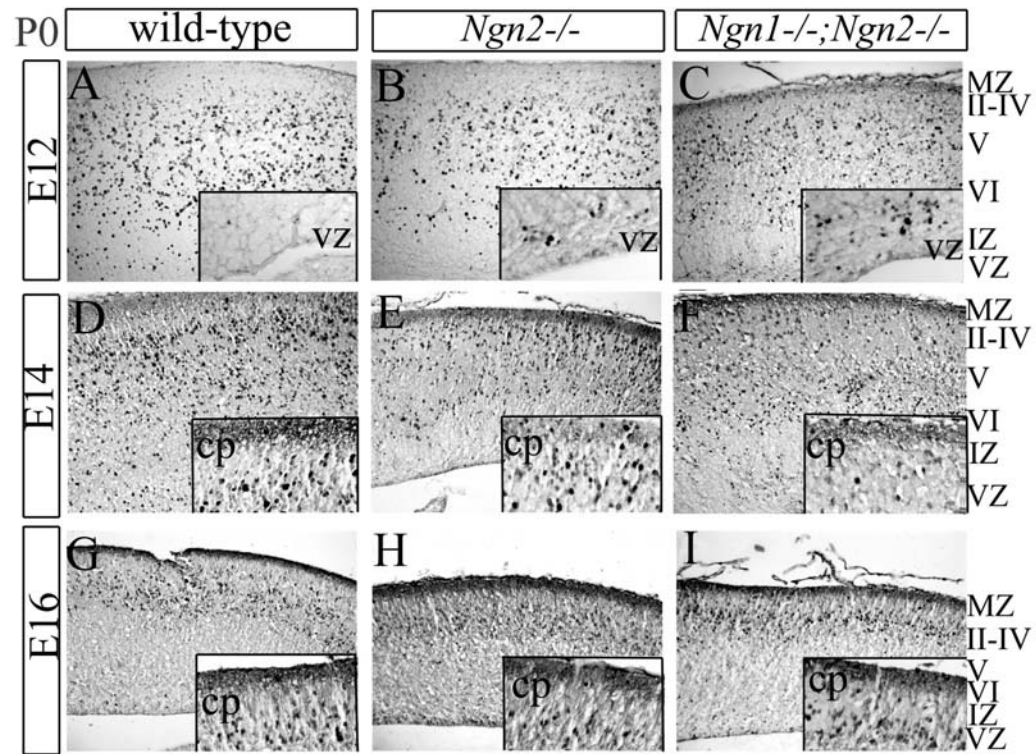

Schuurmans\_Suppl. Fig.3

**Supplementary Figure 3. Birthdating of neurons in P0 neocortex.** Distribution of P0 cortical neurons labeled with BrdU at different times [E12 (A-C), E14 (D-F), E16 (G-I)]. MZ, marginal zone; VZ, ventricular zone; cp, cortical plate.
