# Supplementary material
Source: PubMed Central journal article supplement (PMC514942)
Supplement: 7600278s4.pdf [file 7600278s4.pdf]

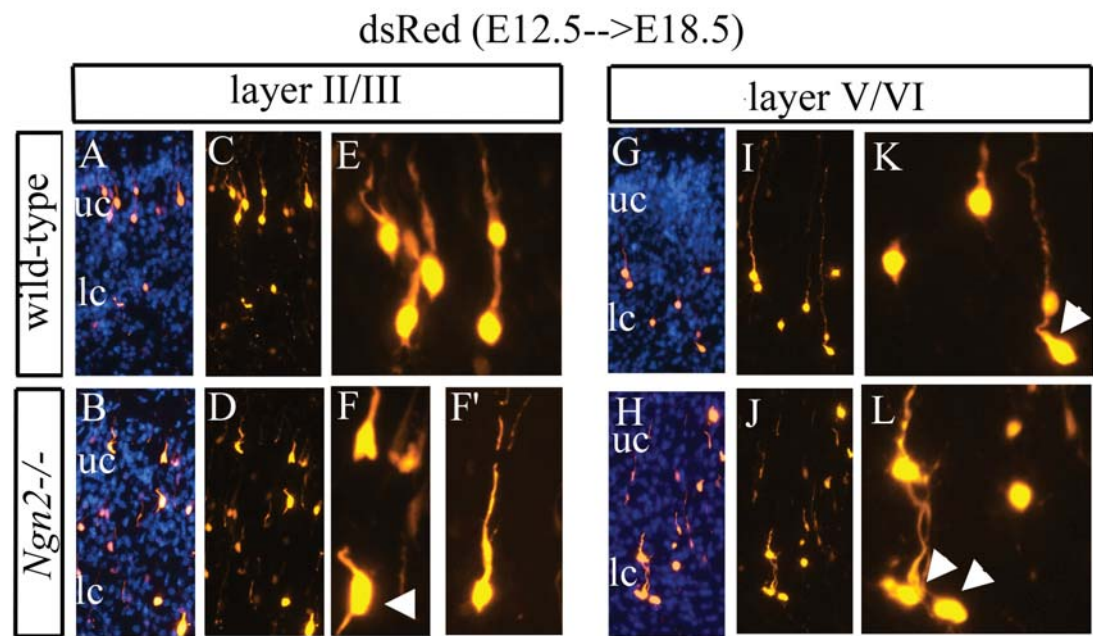

Schuurmans\_Suppl. Fig. 4

**Supplementary Figure 4. Morphologies of lower-layer and upper-layer cortical neurons at E18.5** Cortices of E18.5 embryos electroporated with a dsRed reporter construct at E12.5. (A-F) Layer II/III neurons of wild-type (A, C, E) and *Ngn2* mutant (B, D, F, F') cortices at E18.5 have immature morphologies, usually with a single, unbranched apical dendrite and very short, unbranched basal dendrites. Some neurons have the appearance of migrating neurons, with trailing and leading processes (arrowhead, F). (G-L) Deep layer V/VI neurons in wild-type (G, I, K) and *Ngn2* mutant (H, J, L) cortices have similar, typical, immature morphologies, with sparse basal and apical dendrites. In both wild-type (arrowhead, K) and *Ngn2* mutant (arrowhead, L) cortices, a subset of labelled layer VI neurons were lying on their sides, a typical characteristic of neurons in this layer.
