# Supplementary material
Source: PubMed Central journal article supplement (PMC514942)
Supplement: 7600278s5.pdf [file 7600278s5.pdf]

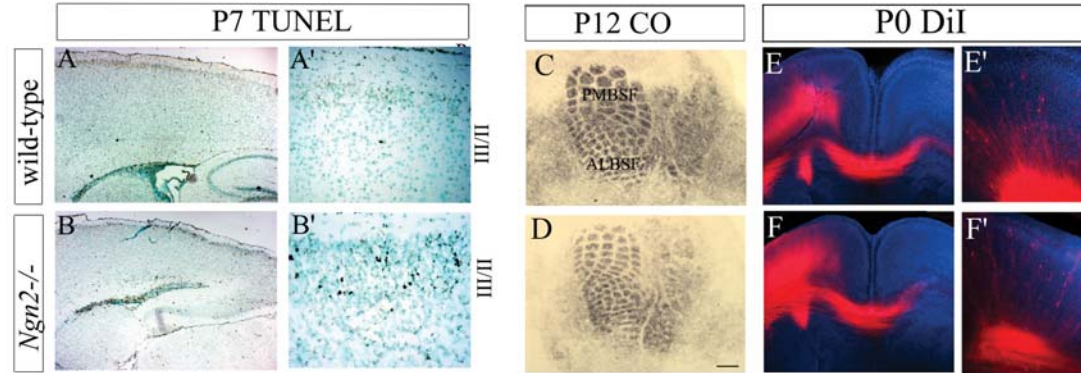

Schuurmans\_Suppl Fig. 5

**Supplementary Figure 5. Upper layer-neurons are correctly specified in *Ngn2* postnatal mutants.** (A-B) TUNEL staining of P7 wild-type (A, A') and *Ngn2* mutant (B, B') cortices revealed excess apoptosis in neurons in *Ngn2* mutant layers II/III neurons. (C, D) The overall topography of primary sensory cortices in P12 wild-type (C) and *Ngn2* mutants (D) was similar in tangential sections stained for cytochrome oxidase, which demarcates termination zones of thalamocortical afferents in layer IV (Woolsey and Van der Loos, 1970). (E, E', F, F') Anterograde tracing of axonal projections to the contralateral hemisphere across the corpus callosum, which includes a significant layer II/III contribution, did not reveal a reduction of commissural projections in *Ngn2* mutants (F, F'). ALBSF, antero-lateral barrel subfield; PMBSF, postero-medial barrel subfield.
