# Supplementary material
Source: PubMed Central journal article supplement (PMC514942)
Supplement: 7600278s6.pdf [file 7600278s6.pdf]

**Supplementary Materials and Methods:****TUNEL assay**

TUNEL staining was performed using the Intergen ApopTag kit, revealing apoptotic cells with DAB and using a methyl green counterstain.

**Zinc and cytochrome oxidase histochemistry**

To chelate and stain synaptic zinc, mice were administered sodium selenite (5 mg/ml intraperitoneal) 60 min prior to dissection (Danscher, 1982). Cortical hemispheres were dissected, flattened, frozen, and 20  $\mu$ m sections were cut using a cryostat. Sections were mounted, placed in a descending series of ethanol (95%, 70%, 50%, water), and dipped in 0.5% gelatin. Selenium-bound zinc was visualized by development in 50% gum arabic/ 2M sodium citrate/ 0.5M hydroquinone/ 37mM silver lactate for 2h. Slides were washed, immersed in 5% sodium thiosulphate for 12 minutes, postfixed, taken through an ethanol series (70%, 95%, 100%), cleared in xylene, and mounted with Permount. Cytochrome oxidase was visualized histochemically using a modified method (Silverman and Tootell, 1987). Briefly, sections were fixed in 4% PFA/50 mM phosphate buffer (pH 7.4; PB), rinsed twice in PB and incubated at 37°C for 45-60 min, in 50mg nickel ammonium sulphate/250 $\mu$ l 1M imidazole/1g sucrose/25mg 3, 3'-diaminobenzidine tetrahydrochloride /15mg cytochromeC/10mg catalase in 100 ml PB. Slides were rinsed in PB, dehydrated in an ascending series of ethanols, cleared in xylene and coverslipped using Permount.

***In utero* electroporation**

*In utero* electroporation was performed as described (Saito and Nakatsuji, 2001). Briefly, a dsRed reporter construct (CMV/ $\beta$ actin promoter/enhancer) was microinjected through the exposed uterus of a pregnant mother, and into the telencephalic vesicles of E12.5 embryos. 5 pulses of 50V were applied across the uterus. The uterus was placed back in the body cavity, the peritoneum and skin were sutured, and the mother was allowed to recover until E18.5. At E18.5, embryos were dissected and genotyped by tail clipping. Brains that were successfully electroporated were fixed for 2 hours in 4%PFA at 4

## Supplementary Material

degrees and processed for cryosectioning. Sectioned brains were counterstained with DAPI, mounted with AquaPolymount and photographed.

**Affymetrix accession numbers:**

Accession numbers for the genes analysed were: *Otx1* (AW125883), *Foxg1* (U36760), *Gli3* (X95255), *COUP-TFI* (X74134), *Pax6* (X63963), *Ngn1* (U63841), *Math3* (AF036257), *Math2* (U29086), *Nsc11* (M97506), *NeuroD* (U28068), *NeuroD2* (D83507), *VGLUT1* (AI846460), *VGLUT2* (AI841371), *Dlx1* (U51000), *Dlx2* (M80540), *GAD1* (Z49976), *Dlx5* (U67840), *Brn4* (M88301), *GAD2* (D42051), *ER-81* (L10426), *Mash1* (M95603), *GABA-T1* (M92378), *GABA/GlyT* (AJ001598).

**RNA in situ probes:**

The cRNA probes used in this study were the following: *Dlx1* (Anderson et al., 1997), *SCG10* (Stein et al., 1988), *Mash1* (Cau et al., 1997), *Ngn2* (Gradwohl et al., 1996), *Ngn1* (Ma et al., 1997), *GAD1* (Behar et al., 1994), *Math2* (Bartholoma and Nave, 1994), *Tbr1* (Hevner et al., 2001), *ER81* (Arber et al., 2000), *ROR-β* (Schaeren-Wiemers et al., 1997), *Oct6* (Meijer et al., 1990), *Emx2* (Theil et al., 1999), *Lhx2* (Bulchand et al., 2001), *Gsh2* (Toresson and Campbell, 2001), *Tlx* (Stenman et al., 2003), *Robo1* (Anselmo et al., 2003), *Slit1* (Anselmo et al., 2003), *Id2* (Gunnarsen et al., 2002), *GluR2* (Hollmann et al., 1989), *Pax6* (Stenman et al., 2003), *VGLUT1/2* (Freneau et al., 2001).

**Supplementary References:**

- Anderson, S.A., Qiu, M., Bulfone, A., Eisenstat, D.D., Meneses, J., Pedersen, R. and Rubenstein, J.L. (1997) Mutations of the homeobox genes *Dlx-1* and *Dlx-2* disrupt the striatal subventricular zone and differentiation of late born striatal neurons. *Neuron*, **19**, 27-37.
- Anselmo, M.A., Dalvin, S., Prodhan, P., Komatsuzaki, K., Aidlen, J.T., Schnitzer, J.J., Wu, J.Y. and Bernard Kinane, T. (2003) *Slit* and *robo*: expression patterns in lung development. *Gene Expr Patterns*, **3**, 13-19.
- Arber, S., Ladle, D.R., Lin, J.H., Frank, E. and Jessell, T.M. (2000) ETS gene *Er81* controls the formation of functional connections between group Ia sensory afferents and motor neurons. *Cell*, **101**, 485-498.

## Supplementary Material

- Bartholoma, A. and Nave, K.A. (1994) NEX-1: a novel brain-specific helix-loop-helix protein with autoregulation and sustained expression in mature cortical neurons. *Mech Dev*, **48**, 217-228.
- Behar, T., Ma, W., Hudson, L. and Barker, J.L. (1994) Analysis of the anatomical distribution of GAD67 mRNA encoding truncated glutamic acid decarboxylase proteins in the embryonic rat brain. *Brain Res Dev Brain Res*, **77**, 77-87.
- Bulchand, S., Grove, E.A., Porter, F.D. and Tole, S. (2001) LIM-homeodomain gene *Lhx2* regulates the formation of the cortical hem. *Mech Dev*, **100**, 165-175.
- Cau, E., Gradwohl, G., Fode, C. and Guillemot, F. (1997) Mash1 activates a cascade of bHLH regulators in olfactory neuron progenitors. *Development*, **124**, 1611-1621.
- Danscher, G. (1982) Exogenous selenium in the brain. A histochemical technique for light and electron microscopical localization of catalytic selenium bonds. *Histochemistry*, **76**, 281-293.
- Freneau, R.T., Jr., Troyer, M.D., Pahner, I., Nygaard, G.O., Tran, C.H., Reimer, R.J., Bellocchio, E.E., Fortin, D., Storm-Mathisen, J. and Edwards, R.H. (2001) The expression of vesicular glutamate transporters defines two classes of excitatory synapse. *Neuron*, **31**, 247-260.
- Gradwohl, G., Fode, C. and Guillemot, F. (1996) Restricted expression of a novel murine atonal-related bHLH protein in undifferentiated neural precursors. *Dev Biol*, **180**, 227-241.
- Gunnensen, J.M., Augustine, C., Spirkoska, V., Kim, M., Brown, M. and Tan, S.S. (2002) Global analysis of gene expression patterns in developing mouse neocortex using serial analysis of gene expression. *Mol Cell Neurosci*, **19**, 560-573.
- Hevner, R.F., Shi, L., Justice, N., Hsueh, Y., Sheng, M., Smiga, S., Bulfone, A., Goffinet, A.M., Campagnoni, A.T. and Rubenstein, J.L. (2001) *Tbr1* regulates differentiation of the preplate and layer 6. *Neuron*, **29**, 353-366.
- Hollmann, M., O'Shea-Greenfield, A., Rogers, S.W. and Heinemann, S. (1989) Cloning by functional expression of a member of the glutamate receptor family. *Nature*, **342**, 643-648.
- Ma, Q., Sommer, L., Cserjesi, P. and Anderson, D.J. (1997) Mash1 and neurogenin1 expression patterns define complementary domains of neuroepithelium in the developing CNS and are correlated with regions expressing notch ligands. *J Neurosci*, **17**, 3644-3652.
- Meijer, D., Graus, A., Kraay, R., Langeveld, A., Mulder, M.P. and Grosveld, G. (1990) The octamer binding factor Oct6: cDNA cloning and expression in early embryonic cells. *Nucleic Acids Res*, **18**, 7357-7365.
- Saito, T. and Nakatsuji, N. (2001) Efficient gene transfer into the embryonic mouse brain using in vivo electroporation. *Dev Biol*, **240**, 237-246.
- Schaeren-Wiemers, N., Andre, E., Kapfhammer, J.P. and Becker-Andre, M. (1997) The expression pattern of the orphan nuclear receptor RORbeta in the developing and adult rat nervous system suggests a role in the processing of sensory information and in circadian rhythm. *Eur J Neurosci*, **9**, 2687-2701.
- Silverman, M.S. and Tootell, R.B. (1987) Modified technique for cytochrome oxidase histochemistry: increased staining intensity and compatibility with 2-deoxyglucose autoradiography. *J Neurosci Methods*, **19**, 1-10.

## Supplementary Material

- Stein, R., Mori, N., Matthews, K., Lo, L.C. and Anderson, D.J. (1988) The NGF-inducible SCG10 mRNA encodes a novel membrane-bound protein present in growth cones and abundant in developing neurons. *Neuron*, **1**, 463-476.
- Stenman, J., Yu, R.T., Evans, R.M. and Campbell, K. (2003) Tlx and Pax6 co-operate genetically to establish the pallio-subpallial boundary in the embryonic mouse telencephalon. *Development*, **130**, 1113-1122.
- Theil, T., Alvarez-Bolado, G., Walter, A. and Ruther, U. (1999) Gli3 is required for Emx gene expression during dorsal telencephalon development. *Development*, **126**, 3561-3571.
- Toresson, H. and Campbell, K. (2001) A role for Gsh1 in the developing striatum and olfactory bulb of Gsh2 mutant mice. *Development*, **128**, 4769-4780.
- Woolsey, T.A. and Van der Loos, H. (1970) The structural organization of layer IV in the somatosensory region (SI) of mouse cerebral cortex. The description of a cortical field composed of discrete cytoarchitectonic units. *Brain Res*, **17**, 205-242.
